# Supplementary material
Source: PubMed Central journal article supplement (PMC3809947)
Supplement: supp_13-12915_IOVS-13-12915-s03.pdf [file supp_13-12915_IOVS-13-12915-s03.pdf]

**Supplementary Table S1.** Dogs tested for the present of *PDE6B* mutation (*crd1* mutation) and *IQCB1* mutation (*crd2* mutation). All dogs were homozygous normal to both mutations.

| #  | Breed                              | Dogs tested for <i>crd1</i> mutation | Dogs tested for <i>crd2</i> mutation |
|----|------------------------------------|--------------------------------------|--------------------------------------|
| 1  | American Cocker Spaniel            | 5                                    | 5                                    |
| 2  | American Eskimo                    | 7                                    | 6                                    |
| 3  | Australian Cattle dog              | 5                                    | 5                                    |
| 4  | Border Collie                      | 5                                    | 5                                    |
| 5  | Chesapeake Bay Retriever           | 6                                    | 5                                    |
| 6  | Chinese Crested                    | -                                    | 5                                    |
| 7  | Elkhound                           | 8                                    | 3                                    |
| 8  | English Cocker Spaniel             | 5                                    | -                                    |
| 9  | English Springer Spaniel           | 5                                    | 5                                    |
| 10 | Entlebucher Mountain Dog           | 5                                    | 5                                    |
| 11 | German Sheppard                    | 9                                    | -                                    |
| 12 | Glen of Imaal Terrier              | 6                                    | 6                                    |
| 13 | Golden retriever                   | 5                                    | 5                                    |
| 14 | Italian Greyhound                  | 5                                    | 5                                    |
| 15 | Labrador Retriever                 | 6                                    | 5                                    |
| 16 | Nova Scotia Duck Tolling retriever | 6                                    | 6                                    |
| 17 | Portuguese Water Dog               | 5                                    | 5                                    |
| 18 | Siberian Husky                     | 7                                    | 5                                    |
| 19 | Tibetan Terrier                    | 5                                    | 5                                    |
|    | <b>Total</b>                       | <b>105</b>                           | <b>86</b>                            |

**Supplementary Table S2. Primers used to screen candidate genes for *crd* diseases. A. Canine *PDE6B* primers sequences, locations and product sizes used to characterize the gene in retinal- cDNA- RT- PCR (i) and in genomic DNA (ii). Primers used for mutation screening are listed in A-iii. B. Canine *IQCB1* primers sequences, locations and product sizes used to characterize the gene in genomic PCR (i) and retinal- cDNA- RT- PCR (ii). Primers used for mutation screening are listed in B-iii.**

| Primer pair                                                                                          | Forward Primer name | Forward primer sequence   | Forward primer location | Reverse Primer name | Reverse primer sequence   | Reverse primer location | Size                     |                        |
|------------------------------------------------------------------------------------------------------|---------------------|---------------------------|-------------------------|---------------------|---------------------------|-------------------------|--------------------------|------------------------|
| <b>A. <i>PDE6B</i> screening.</b>                                                                    |                     |                           |                         |                     |                           |                         |                          |                        |
| <b>A-i. Primers used to amplify retinal cDNA.</b>                                                    |                     |                           |                         |                     |                           |                         |                          |                        |
| 1                                                                                                    | PDE6B_F1            | CTCCAGACAGACAGCCGGACAC    | 5'UTR                   | PDE6B_R1            | CTTCAGGTTTAAGGTGCCGAAGTT  | Exon 3                  | 686                      |                        |
| 2                                                                                                    | PDE6B_F2            | GCTACGAGACCAGGAACATCC     | Exon 2                  | PDE6B_R2            | TACCGACCAGCCCAGGAAGTGG    | Exon 10                 | 782                      |                        |
| 3                                                                                                    | PDE6B_F3            | ACTCGGGCTGGGTCAATCAAGA    | Exon 9                  | PDE6B_R3            | GGGTTCTGGGATTCATCTGGTA    | Exons 14-15             | 721                      |                        |
| 4                                                                                                    | PDE6B_F4            | GGAGGATCACCTACCACAAGTGG   | Exon 13                 | PDE6B_R4            | GAAGTCGATGAAGCCAACCTGTAG  | Exon 20                 | 676                      |                        |
| 5                                                                                                    | PDE6B_F5            | TCGTGGATGAGTCTAAGAAGTACGA | Exon 17                 | PDE6B_R5            | TTAGTCATTTTCTGGGGTCTCTC   | 3' UTR                  | 602                      |                        |
|                                                                                                      |                     |                           |                         |                     |                           |                         | <b>Size observed in:</b> |                        |
|                                                                                                      |                     |                           |                         |                     |                           |                         | <b>Normal allele</b>     | <b>Affected allele</b> |
| <b>A-ii. Primers used to validate deletion in exon 21 on genomic DNA</b>                             |                     |                           |                         |                     |                           |                         |                          |                        |
| 1                                                                                                    | PD_intron20F        | cactgcctgggaactgtcgag     | Intron 20               | PD_intron21R        | gaagccgcattcagttacttggtt  | Intron 21               | 417                      | 414                    |
| <b>A-iii. Primers used to genotype dogs for the mutation using allele-specific extension method.</b> |                     |                           |                         |                     |                           |                         |                          |                        |
| 1                                                                                                    | crd1_AS_wt_F1       | GTTTCGACCGACTGCAGAAACAAC  | Exon 21                 | crd1_R2             | tgccccactgtccctttacac     | Intron 21               | 186                      | -                      |
| 2                                                                                                    | crd1_F4             | gcattctcggggctccttgctc    | Intron 20               | crd1_AS_mut_R6      | AGGCCTTCATTCTCTCTGTaC     | Exon 21                 | -                        | 362                    |
| <b>B. <i>IQCB1</i> screening.</b>                                                                    |                     |                           |                         |                     |                           |                         |                          |                        |
| <b>B-i. Primers used to amplify genomic DNA.</b>                                                     |                     |                           |                         |                     |                           |                         |                          |                        |
| 1                                                                                                    | NPHP5_F1            | atcttgactctccggctccag     | 5' end                  | NPHP5_R1            | ggcctcagttccaccacagat     | intron 1                | 470                      |                        |
| 2                                                                                                    | NPHP5_F2            | gggaggaaggagaagggaaaaa    | intron 1                | NPHP5_R2            | gtcaagtaaggagcagagcgtaa   | intron 2                | 383                      |                        |
| 3                                                                                                    | NPHP5_F3            | tcagagagagtgaatgtggagcac  | intron 2                | NPHP5_R3            | gggagcagagagagacagaaaag   | intron 3                | 558                      |                        |
| 4                                                                                                    | NPHP5_F4            | cccctgccccaaataaataataa   | intron 3                | NPHP5_R4            | ctaccacagaaaagttgcccagtg  | intron 4                | 554                      |                        |
| 5                                                                                                    | NPHP5_F5            | tggcaacaaaagcgataactaaaa  | intron 4                | NPHP5_R5            | gatgggatgagcactgggtgt     | intron 5                | 340                      |                        |
| 6                                                                                                    | NPHP5_F6            | accatgtgtctcattccactct    | intron 5                | NPHP5_R6            | aacacaggtttgatcccaggac    | intron 6                | 462                      |                        |
| 7                                                                                                    | NPHP5_F7            | gaaaggacaaatgaatccaactg   | intron 6                | NPHP5_R7            | agcttgccggttgctaaataaat   | intron 7                | 500                      |                        |
| 8                                                                                                    | NPHP5_F8            | ttcttgcatctcagcacagttagg  | intron 7                | NPHP5_R8            | tccccatcactatttaaccactaaa | intron 8                | 466                      |                        |

|    |           |                            |           |           |                           |           |     |
|----|-----------|----------------------------|-----------|-----------|---------------------------|-----------|-----|
| 9  | NPHP5_F9  | tggtgtgccttgttattccattt    | intron 8  | NPHP5_R9  | atgctttaccgactttgcttgact  | intron 9  | 449 |
| 10 | NPHP5_F10 | gtcaagcaaagtcggtaaagcat    | intron 9  | NPHP5_R10 | taggggaatggacaaaataggtga  | intron 10 | 792 |
| 11 | NPHP5_F11 | ttccctattgtgggatatacagtttg | intron 10 | NPHP5_R11 | caggtagcaggaaatctggttcat  | intron 11 | 363 |
| 12 | NPHP5_F12 | cctttttcattcctttgccacaa    | intron 11 | NPHP5_R12 | atgtttttgcctcctaaccagta   | intron 12 | 448 |
| 13 | NPHP5_F13 | tttagtcacaatcccctcctctc    | intron 12 | NPHP5_R13 | ccttttactccatcttgccctca   | intron 13 | 670 |
| 14 | NPHP5_F14 | ccagaaagaaactaccctgaat     | intron 13 | NPHP5_R14 | ggaagagcagccaaaaggag      | intron 14 | 562 |
| 15 | NPHP5_F15 | ttgctatcagccacactacaact    | intron 14 | NPHP5_R15 | aataaagtccaagagcacccttctt | 3' UTR    | 840 |

**B-ii. Primers used to amplify retinal cDNA.**

|   |           |                            |         |           |                          |         |     |
|---|-----------|----------------------------|---------|-----------|--------------------------|---------|-----|
| 1 | crd2_m_F1 | cgagagaggctgaggatcttt      | exon1+2 | crd2_m_R1 | ccagaagagagaatcggtcacaat | exon 6  | 560 |
| 2 | crd2_m_F2 | atcttctggtttggggagacgat    | exon 5  | crd2_m_R2 | gggattcagtcacagcagtagga  | exon 8  | 381 |
| 3 | crd2_m_F3 | gctttatcaactcctaaccagtc    | exon 8  | crd2_m_R3 | ttttcctttccctgtaccctctc  | exon 12 | 567 |
| 4 | crd2_m_F5 | gggaaatagaagagaaatcagccttg | exon 12 | crd2_m_R5 | tgagatagtcacttgttgcttt   | exon 13 | 249 |
| 5 | crd2_m_F4 | gcaaagtgccgtaagaaaagaaa    | exon 13 | crd2_m_R4 | tggtcgtgtggaaaaggaaaata  | 3' UTR  | 698 |

**Size observed in:**

|                      |                        |
|----------------------|------------------------|
| <b>Normal allele</b> | <b>Affected allele</b> |
|----------------------|------------------------|

**B-iii. Primers used to genotype dogs for the mutation.**

|   |             |                        |          |              |                                 |                      |     |     |
|---|-------------|------------------------|----------|--------------|---------------------------------|----------------------|-----|-----|
| 1 | CRD2_test2F | gcctcctgccagcttatta    | intron 9 | CRD2_test2R  | tttacctgaaactcctctgcaa          | exon 10<br>+intron10 | 243 | 244 |
| 2 | crd2_AST_F3 | cctgccagcttattagagtaga | intron 9 | crd2_AST_RN1 | ctctgcaaagtaatcacagcagatga<br>a | exon 10              | 225 | -   |
| 3 | crd2_AST_F3 | cctgccagcttattagagtaga | intron 9 | crd2_AST_RA1 | ctctgcaaagtaatcacagcagatga<br>g | exon 10              | -   | 226 |

**Supplementary Table S3.** Heritability frequency analysis of dogs with either one parent genotyped (n=4) or both parents genotyped (n=30) in the *crd1* study. NA=not available.

| Dog | Parent 1 | Parent 2        | # correct       | # errors    | Total           | Heritability Freq |
|-----|----------|-----------------|-----------------|-------------|-----------------|-------------------|
| 5   | 2        | NA              | 169754          | 24          | 169778          | 0.9998            |
| 4   | 2        | NA              | 170021          | 19          | 170040          | 0.9998            |
| 3   | 2        | NA              | 169780          | 30          | 169810          | 0.9998            |
| 21  | 12       | NA              | 169723          | 11          | 169734          | 0.9999            |
|     |          | <b>Average:</b> | <b>169819.5</b> | <b>21</b>   | <b>169840.5</b> | <b>0.9998</b>     |
| 9   | 3        | 4               | 168728          | 30          | 168758          | 0.9998            |
| 6   | 3        | 4               | 167267          | 32          | 167299          | 0.9998            |
| 7   | 3        | 4               | 168912          | 21          | 168933          | 0.9999            |
| 12  | 5        | 4               | 168877          | 39          | 168916          | 0.9998            |
| 14  | 5        | 4               | 168793          | 43          | 168836          | 0.9997            |
| 15  | 5        | 4               | 168967          | 36          | 169003          | 0.9998            |
| 17  | 9        | 4               | 168993          | 21          | 169014          | 0.9999            |
| 19  | 9        | 4               | 169054          | 26          | 169080          | 0.9998            |
| 18  | 9        | 4               | 168888          | 22          | 168910          | 0.9999            |
| 28  | 17       | 21              | 165928          | 136         | 166064          | 0.9992            |
| 23  | 17       | 21              | 168991          | 27          | 169018          | 0.9998            |
| 22  | 17       | 21              | 169108          | 31          | 169139          | 0.9998            |
| 24  | 17       | 21              | 168813          | 29          | 168842          | 0.9998            |
| 26  | 17       | 21              | 169037          | 19          | 169056          | 0.9999            |
| 59  | 19       | 4               | 169353          | 16          | 169369          | 0.9999            |
| 41  | 19       | 4               | 169398          | 21          | 169419          | 0.9999            |
| 60  | 19       | 4               | 169329          | 18          | 169347          | 0.9999            |
| 43  | 19       | 4               | 169316          | 21          | 169337          | 0.9999            |
| 47  | 19       | 4               | 169100          | 21          | 169121          | 0.9999            |
| 58  | 19       | 4               | 169368          | 19          | 169387          | 0.9999            |
| 44  | 19       | 4               | 168868          | 36          | 168904          | 0.9998            |
| 54  | 19       | 4               | 169322          | 20          | 169342          | 0.9999            |
| 45  | 19       | 4               | 169393          | 16          | 169409          | 0.9999            |
| 55  | 19       | 4               | 169329          | 21          | 169350          | 0.9999            |
| 46  | 19       | 4               | 169283          | 16          | 169299          | 0.9999            |
| 56  | 19       | 4               | 169337          | 16          | 169353          | 0.9999            |
| 57  | 19       | 4               | 169437          | 22          | 169459          | 0.9999            |
| 32  | 19       | 21              | 168900          | 28          | 168928          | 0.9998            |
| 33  | 19       | 21              | 169064          | 28          | 169092          | 0.9998            |
| 31  | 19       | 21              | 169094          | 28          | 169122          | 0.9998            |
|     |          | <b>Average:</b> | <b>168941.5</b> | <b>28.6</b> | <b>168970.2</b> | <b>0.9998</b>     |

**Supplementary Table S4.** Genotype calls for disease- affected dogs (pink numbers) and obligated carriers (yellow numbers), or unaffected dogs (light green numbers) are shown. Number of dogs are corresponding to the numbers in the pedigrees. Columns = dogs, rows = SNPs genotypes. AA represents a homozygous genotype for allele 1, colored in green, BB represent homozygous genotype for allele 2, colored in orange, and AB represent heterozygous genotype, colored in yellow. White (--) = no call. The homozygous blocks are boxed and sizes are marked. Highlighted in purple are the boundaries of these blocks, and number of SNPs supporting each block is marked. Highlighted in brown are the SNPs with the highest  $-\log_{10}(P)$  values.

**A.** Genotype calls from 17 *crd1*-affected cases 18 control dogs, in a 1.278 Mb interval on CFA3 are shown. **B.** Genotype calls from 14 *crd2*-affected cases and 13 obligated carrier control dogs, in a 7.76 Mb interval on CFA33 are shown.

**Supplementary Table S5.** Homozygous analysis results of the *crd1*- affected dogs (A) and *crd2*- affected dogs (B). In Bold is the mutation- bearing block.

| Chromosome number                    | Position 1        | Position 2        | Size (Mb)   | Number of SNPs within the homozygous block |
|--------------------------------------|-------------------|-------------------|-------------|--------------------------------------------|
| <b>A. <i>crd1</i>- affected dogs</b> |                   |                   |             |                                            |
| 1                                    | 3,014,448         | 4,989,300         | 1.97        | 133                                        |
| 2                                    | 69,772,560        | 71,266,032        | 1.49        | 131                                        |
| <b>3</b>                             | <b>93,388,160</b> | <b>94,693,816</b> | <b>1.30</b> | <b>114</b>                                 |
| <b>B. <i>crd2</i>- affected dogs</b> |                   |                   |             |                                            |
| <b>33</b>                            | <b>27,065,615</b> | <b>29,382,529</b> | <b>2.3</b>  | <b>47</b>                                  |

**Supplementary Table S6.** Differences observed in *PDE6B* coding sequence of normal and *crd1*- affected dogs compared to the deposit gene NM001002934 and the boxer reference sequences.

| Number | Location on CFA3 (CanFam2.0) | NM001002934 | Boxer Database | Normal | <i>crd1</i> -affected | Position within the coding sequence |
|--------|------------------------------|-------------|----------------|--------|-----------------------|-------------------------------------|
| 1      | 94,601,362                   | A           | G              | GG     | GG                    | 36                                  |
| 2      | 94,601,361                   | A           | G              | GG     | GG                    | 37                                  |
| 3      | 94,601,360                   | G           | A              | AA     | AA                    | 38                                  |
| 4      | 94,601,047                   | C           | C              | CT     | CC                    | 351                                 |
| 5      | 94,597,081                   | G           | C              | CC     | CC                    | 555                                 |
| 6      | 94,597,080                   | C           | G              | GG     | GG                    | 556                                 |
| 7      | 94,597,030                   | G           | A              | AA     | AA                    | 606                                 |
| 8      | 94,597,027                   | T           | C              | CC     | CC                    | 609                                 |
| 9      | 94,575,468                   | T           | C              | CC     | CC                    | 2,343                               |
| 10     | 94,574,291                   | A           | A              | AA     | del/del               | 2,404                               |
| 11     | 94,574,290                   | A           | A              | AA     | del/del               | 2,405                               |
| 12     | 94,574,289                   | C           | C              | CC     | del/del               | 2,406                               |
