# Supplementary material
Source: PubMed Central journal article supplement (PMC3809947)
Supplement: supp_13-12915_IOVS-13-12915-s04.pdf [file supp_13-12915_IOVS-13-12915-s04.pdf]

**Supplementary Figure S1.** *IQCB1* mRNA sequence and predicted protein in normal and affected dogs. **A.** Normal *IQCB1* mRNA (Accession number KF366421). Boxed are the first Methionin and the stop. **B.** *IQCB1* predicted protein in a normal dog, 598 amino acids. **C.** Affected *IQCB1* mRNA. Boxed are the first methionin and the premature stop codon. Underline is the stop codon in a wild-type allele. Bolded and enlarged are the 3 cytosines, which represent the insertional mutation site. **D.** The predicted *IQCB1* protein in the affected dog. Bold is the sequence that is different from the normal. The predicted protein is 330 amino acids long.

A.

GGAGGCAGTAACGGCAGGCCAGGAAGACGACTTCCCCAAGCCTCAGGCCCCAGCTCGTG  
CTGTGACAACAGGGTGATGTAAGAAATGAAAGCCAACAGGTACAGACCCAAGGATCTTAT  
CTCTAGCTGCTGAAGTTGCAAAAAGTCTGAGCAAAATGTCCCTGTTATACTATTGAAGT  
TAAAAGAAATAATAACAACACACCTTTAGGAAGCTCAGAGTTGAAGAAAATCAAACAA  
GATATATATTGTTATGACCTCATTCAGTATTGCCTTTTGGTGCTCAGTCAAGATTGTTCT  
CGAATCCAGGGAGGTTGGACTACAATATCCCAACTTACACAGATATTAAGCCACTGCTGT  
GTGGGCTTGGAGCCAGGAGAAGATGCAGAGGAATTTTACAATGAATTACTCCCATCAGC  
TGCAGAAAATTTTCTGGTTTTGGGGAGACGATTGCAAACATGTTTCATCAATTCAGCTA  
AGGGTGAAGAAAAGATGAATTACTACACTCGTTCCAAATTGTGACCGATTCTCTCTTCT  
GGCTCTTAGGAGGCCATGTTCAACTCATCCAAAATGTACTACAAAGTGATCATTCTTGC  
ACTACTGCAAACGACAATGTTCAAATAGGATCTACAGTCATGACTATGCTACAGAAC  
ATACTACAGATCAACAGTGGTGATTTACTCAGAATAGAAGGAAAAATCCTACATTCAAT  
TTTAGATGAAGTTGTTTTCAAGCTTTTATCAACTCCTAACCAGTCATAAGAAGTACTGC  
TACAAAGCTCCTACTGCTGATGACTGAATCCCATCAGGAAATTTTGATTTTACTGAGACT  
AAGTGCCTGCTACAAAGGACTCAGAAGTCTATTAACAACATGAGCCTGGGACAGAGT  
TTAGTCAAGAACTTGGACAGCTTATTGCCCTTTTAACCCCTAAGGTCTATCAGGAAGTAG  
AAGATCAGAACTACATCAAGCAGCTTGCTTGATTCAAGCTTATTGGAAGGGTTTCCAA  
ACTAGAAAAGATTAAGAAGCTTCCATCTGCTGTGATTACTTTGCAGAGGAGTTTCAG  
ATCTAAACGAACCAAGATATTACTAAAGCTAAATAAGCAGAAAGAAGAAGAGGACCGCA  
GATTACAGTTGCAACTTCAAAGACAGAGGCCATGAGATTGTCCCGAGAATTACGGCTG  
AGTATGCTCGAAATAGTTCATCCAGGTCAGGTGGAATAATAATCGGGAAATAGAAGA  
GAAATCAGCCTTGATTATCCAGAAACACTGGAGAGGGTACAGGGAAAGGAAAAATTTTC  
GCCAACAGAGGCCATCTCTCACGGAATATAAAGCAGCTGTCATACTTCAAAGAGCAACTC  
TTAAATTCCTAGCAAAGTGCCGTAAGAAAAAGAACTATTTGCTCCTTGGCGAGGACTT  
CAAGATCTCACCGATGCACGGAGAGTTGAATTAAGCAACAAGTGGATGACTATCTCAG  
AAGACATCCGAGCTCTCAAATGTCAGATATGACTAGCAGAGAGCTCCATTCCCAAGCTCA  
AGAACAACCTGCAACACTACCTTATGGGCAGGGCCCTAGAAGAGAGAGCCAGCAGCACAG  
GGAGGCTCTGATGGCTCAGATCAGCACCAACATTGAACAGTTAATGAAGGCACCGAGTCT  
GAAGGAGGCAGAAGGGAAAGAACCTGAACTCTTCCCTAAGTAGATCCAGGCCTGTGGCAG  
CTAAGGCCAAGCAGGCCCATCTTACTGCCCTGAAGCATATACAGGCACCTTGGTGGAAGA  
AGCTTGGGGAAGAAGCAGGAGATGAGATTGATGTTCCAAAGGATGAGTTAGTTAGAA  
TTAGGAACCTTATTCATTGGTGAACCAACCCCTTAGGAAGCTATCCAGAGAAATGA  
CACAAATCCTTTATTTTAGATTATTTTGGTTCTGCCTCTGGCATGCTAGTAGACTAGAGC  
TATCTTTTACTCATGGCTTCCAGAGATTCCTCTCCAAATAAGATTTTCAGGCAGTAAGC  
AAAGA

B.

MKPTGTDPRILSLAAEVAKSPEQNVPVILLKLKEIINNTPLGSSELKKIKQDIYC  
YDLIQYCLLVLSQDCSRIQGGWTTISQLTQILSHCCVGLPEGEDAEFFYNELLPS  
AAENFLVLGRRLQTCFINSAGEEKDELLHSFQIVTDSLFWLLGGHVQLIQNVLQ  
SDHFLHLLQTDNVQIGSTVMTMLQNILQINSGDLLRIEGKILHSILDEVVFKLLS  
TPNPVIRSTATKLLLLMTESHQEILILLRLSACYKGLRSLLNKHEPGTEFSQELG  
QLIALLLTPKVYQEVEDQKLHQAACLIQAYWKGFQTRKRLKKLPSAVITLQRSFRS  
KRTKILLKLNKQKEEEDRRLQLQLQRQRAMRLSRELRLSMLEIVHPGQVEKYNRE  
IEKSALI IQKHWRGYRERKNFRQQRPSLTEYKAAVILQRATLKF LAKCRKKKKL  
FAPWRGLQDLTDARRVELKQOVDDYLRRHPSSQMSDMTSRELHSQAQEQLQHYLM  
GRALEERAQQHREALMAQISTNIEQLMKAPSLKEAEGKEPELFLSRSRPVAAKAK  
QAHLTALKHIQAPWWKKLGEEAGDEIDVPKDEFSLELGLTFIGGTPP

C.

AGACGACTTCCCCAAGCCTCAGGCCCCAGCTCGTGCTGTGACAACAGGGTGATGTAAGAA  
**ATG**AAGCCAACAGGTACAGACCCAAGGATCTTATCTCTAGCTGCTGAAGTTGCAAAAAG  
TCCTGAGCAAAATGTCCCTGTTATACTATTGAAGTTAAAAGAAATAATAACAACACAC  
CTTTAGGAAGCTCAGAGTTGAAGAAAATCAAACAAGATATATATTGTTATGACCTCATT  
CAGTATTGCCTTTTGGTGCTCAGTCAAGATTGTTCTCGAATCCAGGGAGGTTGGACTACA  
ATATCCCAACTTACACAGATATTAAGCCACTGCTGTGTGGGCTTGGAGCCAGGAGAAGAT  
GCAGAGGAATTTTACAATGAATTACTCCCATCAGCTGCAGAAAATTTTCTGGTTTTGGG  
GAGACGATTGCAAACATGTTTCATCAATTCAGCTAAGGGTGAAGAAAAGATGAATTAC  
TACACTCGTTCCAAATTGTGACCGATTCTCTCTTCTGGCTCTTAGGAGGCCATGTTCAAC  
TCATCCAAAATGTACTACAAAGTGATCATTTTCTTGCACTTACTGCAAAGTACAATGTTT  
AAATAGGATCTACAGTCATGACTATGCTACAGAACAATACTACAGATCAACAGTGGTGAT  
TTACTCAGAATAGAAGGAAAAATCCTACATTCAATTTTAGATGAAGTTGTTTTCAAGCT  
TTTATCAACTCCTAACCAGTCATAAGAAGTACTGCTACAAAGCTCCTACTGCTGATGAC  
TGAATCCCATCAGGAAATTTTGATTTTACTGAGACTAAGTGCCTGCTACAAAGGACTCAG  
AAGTCTATTAACAACAACATGAGCCTGGGACAGAGTTTAGTCAAGAACTTGGACAGCTTA  
TTGCCCTTTTAAACCCTAAGGTCTATCAGGAAGTAGAAGATCAGAAACTACATCAAGCAG  
CTTGCTTGATTCAAGCTTATTGGAAGGGTTTCCAAACTAGAAAAAGATTAAGAAGCTT  
**CCC**ATCTGCTGTGATTACTTTGCAGAGGAGTTT**CAGATCTTAA**ACGAACCAAGATATTAC  
TAAAGCTAAATAAGCAGAAAGAAGAAGAGACCGCAGATTACAGTTGCAACTTCAAAGA  
CAGAGAGCCATGAGATTGTCCCGAGAATTACGGCTGAGTATGCTCGAAATAGTTTCATCCA  
GGTCAGGTGAAAAAATATAATCGGGAAATAGAAGAGAAATCAGCCTTGATTATCCAGAA  
ACACTGGAGAGGGTACAGGGAAAGGAAAAATTTTCGCCAACAGAGGCCATCTCTCACGG  
AATATAAAGCAGCTGTCATACTTCAAAGAGCAACTCTTAAATTCCTAGCAAAGTGCCGT  
AAGAAAAAGAACTATTTGCTCCTTGGCGAGGACTTCAAGATCTCACCGATGCACGGAG  
AGTTGAATTAAGCAACAAGTGGATGACTATCTCAGAAGACATCCGAGCTCTCAAATGT  
CAGATATGACTAGCAGAGAGCTCCATTCCCAAGCTCAAGAACAACACTGCAACACTACCTTA  
TGGGCAGGGCCCTAGAAGAGAGAGCCAGCAGCACAGGGAGGCTCTGATGGCTCAGATCA  
GCACCAACATTGAACAGTTAATGAAGGCACCGAGTCTGAAGGAGGCAGAAGGGAAAGAA  
CCTGAACTCTTCTAAGTAGATCCAGGCCTGTGGCAGCTAAGGCCAAGCAGGCCCATCTT  
ACTGCCCTGAAGCATATACAGGCACCTTGGTGGAAGAAGCTTGGGGAAGAAGCAGGAGA

TGAGATTGATGTTCCAAAGGATGAGTTTAGTTTAGAATTAGGAACTTTATTCATTGGTG  
GAACCAACCCCTTAGGAAGCTATCCAGAGAAATGACACAAATCCTTTATTTTAGATTA  
TTTTGGTTCTGCCTCTGGCATGCTAGTAGACTAGAGCTATCTTTTACTCATGGCTTTCCA  
GAGATTCCTCTCCAAATAAGATTTTCAGGCAGTAAGCAAAGAGTTGTCTTCCCACCTTTT  
GCAGTTC

D.

MKPTGTDPRILSLAAEVAKSPEQNVPVILLKLKEIINNTPLGSSELKKIKQDIYC  
YDLIQYCLLVLSQDCSRIQGGWTTISQLTQILSHCCVGLPEGEDAEFYNELLPS  
AAENFLVLGRRLQTCFINSAKGEEKDELLHSFQIVTDSLFWLLGGHVQLIQNVLQ  
SDHFLHLLQTDNVQIGSTVMTMLQNILQINSGDLLRIEGKILHSILDEVVFKLLS  
TPNPVIRSTATKLLLLMTESHQEILILLRLSACYKGLRSLLNKHEPGTEFSQELG  
QLIALLLTPKVYQEVEDQKLHQAACLIQAYWKGFO~~TRKRLK~~LP**ICCDYFAEEFQI**
